# Supplementary material
Source: Springer Nature journal article supplement (https://www.springermedizin.de/resource/supplementary/13045_2012_228_MOESM5_ESM.pdf/9660910)
Supplement: MOESM5 [file 9660910]

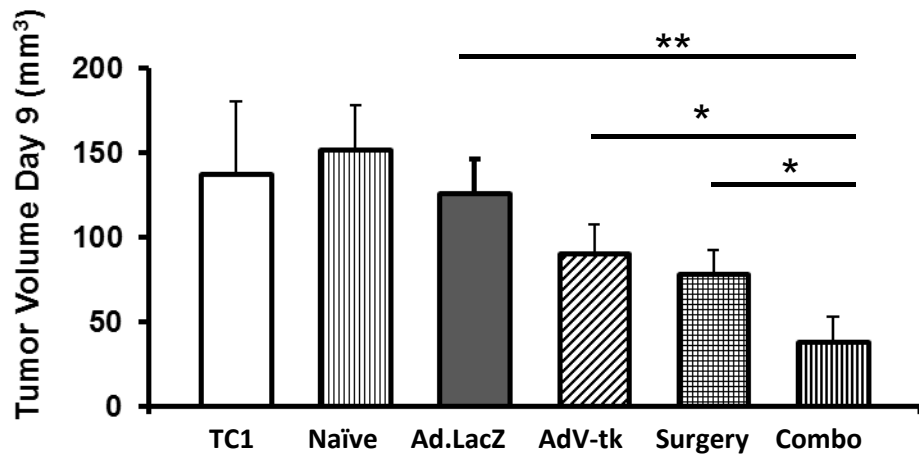

|                                       | TC1 | Naïve | Ad.LacZ | AdV-tk | Surgery | Combo |
|---------------------------------------|-----|-------|---------|--------|---------|-------|
| TC-1 Cells                            | +   | +     | +       | +      | +       | +     |
| Naïve CD8+ T-Cells                    | -   | +     | -       | -      | -       | -     |
| CD8+ T-Cells after Ad.LacZ            | -   | -     | +       | -      | -       | -     |
| CD8+ T-Cells after AdV-tk             | -   | -     | -       | +      | -       | -     |
| CD8+ T-Cells after Surgery            | -   | -     | -       | -      | +       | -     |
| CD8+ T-Cells after AdV-tk AND Surgery | -   | -     | -       | -      | -       | +     |

**A**

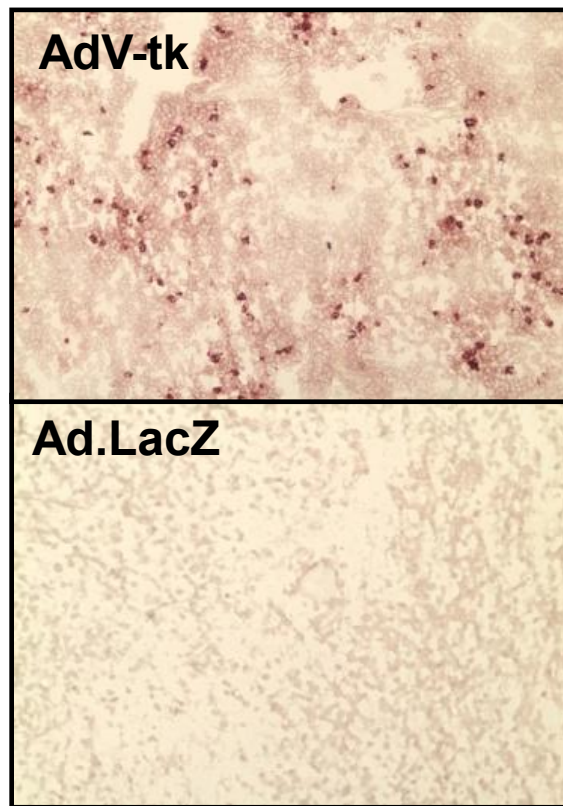

**B**



|                                       | TC1 | Naïve | Ad.LacZ | AdV-tk | Surgery | Combo |
|---------------------------------------|-----|-------|---------|--------|---------|-------|
| TC-1 Cells                            | +   | +     | +       | +      | +       | +     |
| Naïve CD8+ T-Cells                    | -   | +     | -       | -      | -       | -     |
| CD8+ T-Cells after Ad.LacZ            | -   | -     | +       | -      | -       | -     |
| CD8+ T-Cells after AdV-tk             | -   | -     | -       | +      | -       | -     |
| CD8+ T-Cells after Surgery            | -   | -     | -       | -      | +       | -     |
| CD8+ T-Cells after AdV-tk AND Surgery | -   | -     | -       | -      | -       | +     |

**A**



**B**
